# Supplementary material
Source: PubMed Central journal article supplement (PMC3086592)

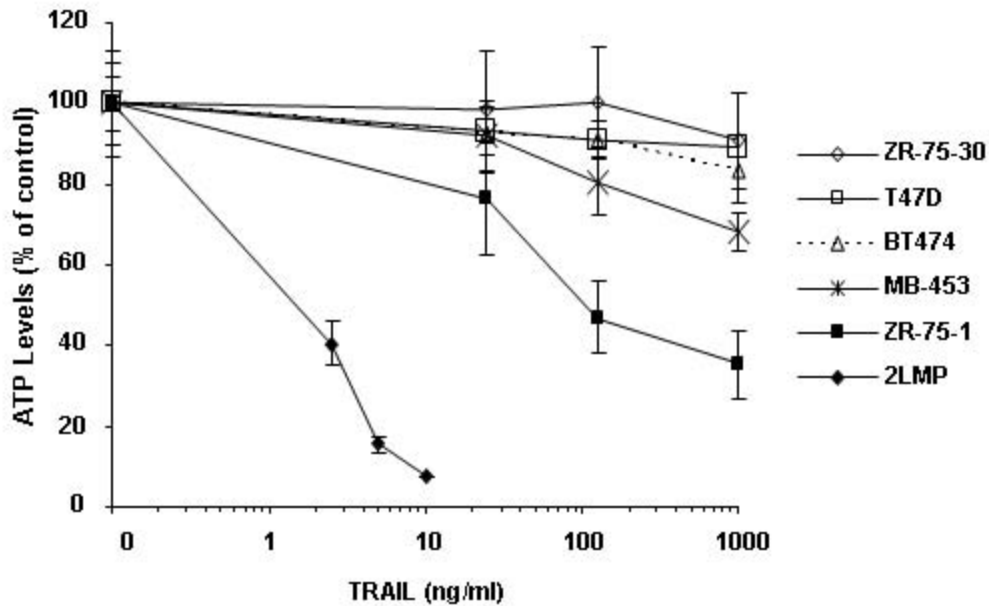

Supplement: NIHMS280751-supplement-Fig__1.pdf [file NIHMS280751-supplement-Fig__1.pdf]

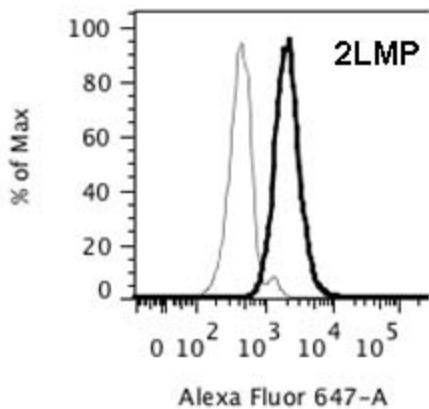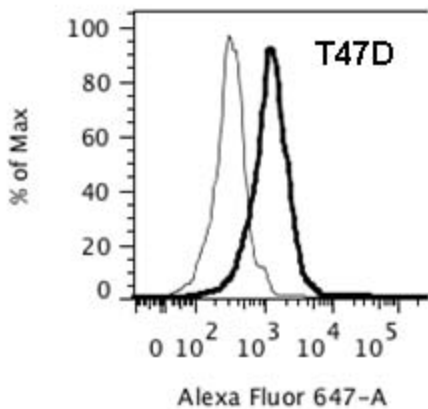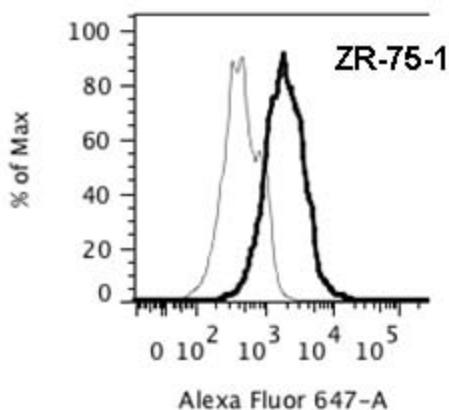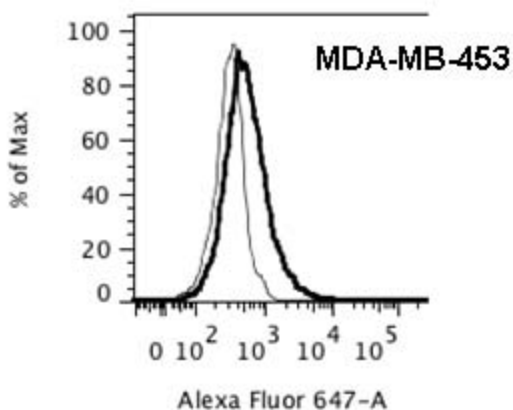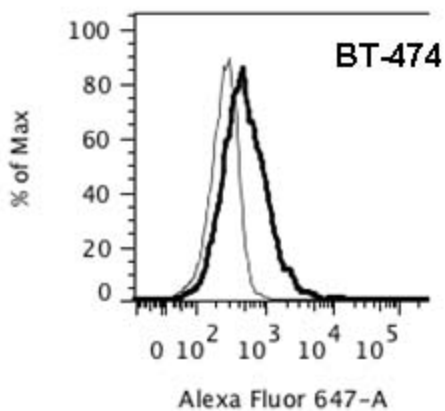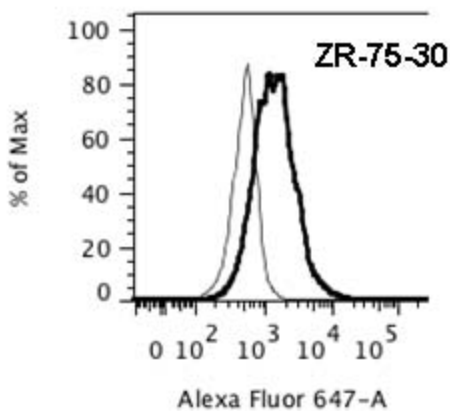

Supplement: NIHMS280751-supplement-Fig__2.pdf [file NIHMS280751-supplement-Fig__2.pdf]
